# Supplementary material for: The Entero-Mammary Pathway and Perinatal Transmission of Gut Microbiota and SARS-CoV-2
Source: MDPI journal article supplement (doi:10.3390/ijms231810306), 2022-09-07
Supplement: s1 [file s1]

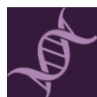

Article

# The Entero-Mammary Pathway and Perinatal Transmission of Gut Microbiota and SARS-CoV-2

Carmen Josefina Juárez-Castelán, Juan Manuel Vélez-Ixta, Karina Corona-Cervantes, Alberto Piña-Escobedo, Yair Cruz-Narváez, Alejandro Hinojosa-Velasco, María Esther Landero-Montes de Oca, Eduardo Dávila-Gonzalez, Eduardo González-del Olmo, Fernando Guadalupe Bastida-González, Paola Berenice Zárate-Segura, Jaime García-Mena

## Supplementary Material

### Tables

**Table S1.** 5' to 3' sequence of barcoded primers for bacteria used in this study.

| Primer     | Ion Torrent linker             | Golay barcode | Spacer | 16S rRNA gene     |
|------------|--------------------------------|---------------|--------|-------------------|
| V3-341 F1  | CCATCTCATCCCTGCGTGTCTCCGACTCAG | GATCTGCGATCC  | GT     | CCTACGGGAGGCAGCAG |
| V3-341 F2  | CCATCTCATCCCTGCGTGTCTCCGACTCAG | CAGCTCATCAGC  | GT     | CCTACGGGAGGCAGCAG |
| V3-341 F3  | CCATCTCATCCCTGCGTGTCTCCGACTCAG | CAAACAACAGCT  | GT     | CCTACGGGAGGCAGCAG |
| V3-341 F4  | CCATCTCATCCCTGCGTGTCTCCGACTCAG | GCAACACCATCC  | GT     | CCTACGGGAGGCAGCAG |
| V3-341 F5  | CCATCTCATCCCTGCGTGTCTCCGACTCAG | GCGATATATCGC  | GT     | CCTACGGGAGGCAGCAG |
| V3-341 F6  | CCATCTCATCCCTGCGTGTCTCCGACTCAG | CGAGCAATCCTA  | GT     | CCTACGGGAGGCAGCAG |
| V3-341 F7  | CCATCTCATCCCTGCGTGTCTCCGACTCAG | AGTCGTGCACAT  | GT     | CCTACGGGAGGCAGCAG |
| V3-341 F8  | CCATCTCATCCCTGCGTGTCTCCGACTCAG | GTATCTGCGCGT  | GT     | CCTACGGGAGGCAGCAG |
| V3-341 F9  | CCATCTCATCCCTGCGTGTCTCCGACTCAG | CGAGGGAAAGTC  | GT     | CCTACGGGAGGCAGCAG |
| V3-341 F10 | CCATCTCATCCCTGCGTGTCTCCGACTCAG | CAAATTCGGGAT  | GT     | CCTACGGGAGGCAGCAG |
| V3-341 F11 | CCATCTCATCCCTGCGTGTCTCCGACTCAG | AGATTGACCAAC  | GT     | CCTACGGGAGGCAGCAG |
| V3-341 F12 | CCATCTCATCCCTGCGTGTCTCCGACTCAG | AGTTACGAGCTA  | GT     | CCTACGGGAGGCAGCAG |
| V3-341 F13 | CCATCTCATCCCTGCGTGTCTCCGACTCAG | GCATATGCACTG  | GT     | CCTACGGGAGGCAGCAG |
| V3-341 F14 | CCATCTCATCCCTGCGTGTCTCCGACTCAG | CAACTCCCCTGA  | GT     | CCTACGGGAGGCAGCAG |
| V3-341 F15 | CCATCTCATCCCTGCGTGTCTCCGACTCAG | TTGCGTTAGCAG  | GT     | CCTACGGGAGGCAGCAG |
| V3-341 F16 | CCATCTCATCCCTGCGTGTCTCCGACTCAG | TACGAGCCCTAA  | GT     | CCTACGGGAGGCAGCAG |
| V3-341 F17 | CCATCTCATCCCTGCGTGTCTCCGACTCAG | CACTACGCTAGA  | GT     | CCTACGGGAGGCAGCAG |
| V3-341 F18 | CCATCTCATCCCTGCGTGTCTCCGACTCAG | TGCAGTCCTCGA  | GT     | CCTACGGGAGGCAGCAG |
| V3-341 F19 | CCATCTCATCCCTGCGTGTCTCCGACTCAG | ACCATAGCTCCG  | GT     | CCTACGGGAGGCAGCAG |
| V3-341 F20 | CCATCTCATCCCTGCGTGTCTCCGACTCAG | TGGACATCTCTT  | GT     | CCTACGGGAGGCAGCAG |
| V3-341 F21 | CCATCTCATCCCTGCGTGTCTCCGACTCAG | GAACACTTTGGA  | GT     | CCTACGGGAGGCAGCAG |
| V3-341 F22 | CCATCTCATCCCTGCGTGTCTCCGACTCAG | GAGCCATCTGTA  | GT     | CCTACGGGAGGCAGCAG |
| V3-341 F23 | CCATCTCATCCCTGCGTGTCTCCGACTCAG | TTGGGTACACGT  | GT     | CCTACGGGAGGCAGCAG |
| V3-341 F24 | CCATCTCATCCCTGCGTGTCTCCGACTCAG | AAGGCGCTCCTT  | GT     | CCTACGGGAGGCAGCAG |
| V3-341 F25 | CCATCTCATCCCTGCGTGTCTCCGACTCAG | TAATACGGATCG  | GT     | CCTACGGGAGGCAGCAG |
| V3-341 F26 | CCATCTCATCCCTGCGTGTCTCCGACTCAG | TCGGAATTAGAC  | GT     | CCTACGGGAGGCAGCAG |
| V3-341 F27 | CCATCTCATCCCTGCGTGTCTCCGACTCAG | TGTGAATTCGGA  | GT     | CCTACGGGAGGCAGCAG |
| V3-341 F28 | CCATCTCATCCCTGCGTGTCTCCGACTCAG | CATTCTGTGCGT  | GT     | CCTACGGGAGGCAGCAG |
| V3-341 F29 | CCATCTCATCCCTGCGTGTCTCCGACTCAG | AACGCACGCTAG  | GT     | CCTACGGGAGGCAGCAG |
| V3-341 F30 | CCATCTCATCCCTGCGTGTCTCCGACTCAG | ACACTGTTTCATG | GT     | CCTACGGGAGGCAGCAG |
| V3-341 F31 | CCATCTCATCCCTGCGTGTCTCCGACTCAG | ACCAGACGATGC  | GT     | CCTACGGGAGGCAGCAG |
| V3-341 F32 | CCATCTCATCCCTGCGTGTCTCCGACTCAG | ACGCTCATGGAT  | GT     | CCTACGGGAGGCAGCAG |
| V3-341 F33 | CCATCTCATCCCTGCGTGTCTCCGACTCAG | ACTCACGGTATG  | GT     | CCTACGGGAGGCAGCAG |
| V3-341 F34 | CCATCTCATCCCTGCGTGTCTCCGACTCAG | AGACCGTCAGAC  | GT     | CCTACGGGAGGCAGCAG |
| V3-341 F35 | CCATCTCATCCCTGCGTGTCTCCGACTCAG | AGCACGAGCCTA  | GT     | CCTACGGGAGGCAGCAG |
| V3-341 F36 | CCATCTCATCCCTGCGTGTCTCCGACTCAG | ACAGACCACTCA  | GT     | CCTACGGGAGGCAGCAG |
| V3-341 F37 | CCATCTCATCCCTGCGTGTCTCCGACTCAG | ACCAGCGACTAG  | GT     | CCTACGGGAGGCAGCAG |
| V3-341 F38 | CCATCTCATCCCTGCGTGTCTCCGACTCAG | ACGGATCGTCAG  | GT     | CCTACGGGAGGCAGCAG |
| V3-341 F39 | CCATCTCATCCCTGCGTGTCTCCGACTCAG | AGCTTGACAGCT  | GT     | CCTACGGGAGGCAGCAG |
| V3-341 F40 | CCATCTCATCCCTGCGTGTCTCCGACTCAG | AACTGTGCGTAC  | GT     | CCTACGGGAGGCAGCAG |
| V3-341 F41 | CCATCTCATCCCTGCGTGTCTCCGACTCAG | ACCGCAGAGTCA  | GT     | CCTACGGGAGGCAGCAG |
| V3-341 F42 | CCATCTCATCCCTGCGTGTCTCCGACTCAG | ACGGTGAGTGTC  | GT     | CCTACGGGAGGCAGCAG |



|             |                                |               |    |                   |
|-------------|--------------------------------|---------------|----|-------------------|
| V3-341 F43  | CCATCTCATCCCTGCGTGTCTCCGACTCAG | ACTCGATTTCGAT | GT | CCTACGGGAGGCAGCAG |
| V3-341 F44  | CCATCTCATCCCTGCGTGTCTCCGACTCAG | AGACTGCGTACT  | GT | CCTACGGGAGGCAGCAG |
| V3-341 F45  | CCATCTCATCCCTGCGTGTCTCCGACTCAG | AGCAGTCGCGAT  | GT | CCTACGGGAGGCAGCAG |
| V3-341 F46  | CCATCTCATCCCTGCGTGTCTCCGACTCAG | AGGACGCACTGT  | GT | CCTACGGGAGGCAGCAG |
| V3-341 F47  | CCATCTCATCCCTGCGTGTCTCCGACTCAG | AAGAGATGTCTGA | GT | CCTACGGGAGGCAGCAG |
| V3-341 F48  | CCATCTCATCCCTGCGTGTCTCCGACTCAG | ACAGCAGTGGTC  | GT | CCTACGGGAGGCAGCAG |
| V3-341 F49  | CCATCTCATCCCTGCGTGTCTCCGACTCAG | ACGTACTCAGTG  | GT | CCTACGGGAGGCAGCAG |
| V3-341 F50  | CCATCTCATCCCTGCGTGTCTCCGACTCAG | ACTCGCACAGGA  | GT | CCTACGGGAGGCAGCAG |
| V3-341 F51  | CCATCTCATCCCTGCGTGTCTCCGACTCAG | AGAGAGCAAGTG  | GT | CCTACGGGAGGCAGCAG |
| V3-341 F52  | CCATCTCATCCCTGCGTGTCTCCGACTCAG | AGCATATGAGAG  | GT | CCTACGGGAGGCAGCAG |
| V3-341 F53  | CCATCTCATCCCTGCGTGTCTCCGACTCAG | AGGCTACACGAC  | GT | CCTACGGGAGGCAGCAG |
| V3-341 F54  | CCATCTCATCCCTGCGTGTCTCCGACTCAG | AAGCTGCAGTCG  | GT | CCTACGGGAGGCAGCAG |
| V3-341 F55  | CCATCTCATCCCTGCGTGTCTCCGACTCAG | ACAGCTAGCTTG  | GT | CCTACGGGAGGCAGCAG |
| V3-341 F56  | CCATCTCATCCCTGCGTGTCTCCGACTCAG | ACCTGTCTCTCT  | GT | CCTACGGGAGGCAGCAG |
| V3-341 F57  | CCATCTCATCCCTGCGTGTCTCCGACTCAG | ACGTCTGTAGCA  | GT | CCTACGGGAGGCAGCAG |
| V3-341 F58  | CCATCTCATCCCTGCGTGTCTCCGACTCAG | AGAGCAAGAGCA  | GT | CCTACGGGAGGCAGCAG |
| V3-341 F59  | CCATCTCATCCCTGCGTGTCTCCGACTCAG | AGCCATACTGAC  | GT | CCTACGGGAGGCAGCAG |
| V3-341 F60  | CCATCTCATCCCTGCGTGTCTCCGACTCAG | AGGTGTGATCGC  | GT | CCTACGGGAGGCAGCAG |
| V3-341 F61  | CCATCTCATCCCTGCGTGTCTCCGACTCAG | AATCAGTCTCGT  | GT | CCTACGGGAGGCAGCAG |
| V3-341 F62  | CCATCTCATCCCTGCGTGTCTCCGACTCAG | ACGACGTCTTAG  | GT | CCTACGGGAGGCAGCAG |
| V3-341 F63  | CCATCTCATCCCTGCGTGTCTCCGACTCAG | ACGTGAGAGAAT  | GT | CCTACGGGAGGCAGCAG |
| V3-341 F64  | CCATCTCATCCCTGCGTGTCTCCGACTCAG | ACTGACAGCCAT  | GT | CCTACGGGAGGCAGCAG |
| V3-341 F65  | CCATCTCATCCCTGCGTGTCTCCGACTCAG | AGCGACTGTGCA  | GT | CCTACGGGAGGCAGCAG |
| V3-341 F66  | CCATCTCATCCCTGCGTGTCTCCGACTCAG | AGTACGCTCGAG  | GT | CCTACGGGAGGCAGCAG |
| V3-341 F67  | CCATCTCATCCCTGCGTGTCTCCGACTCAG | AATCGTGACTCG  | GT | CCTACGGGAGGCAGCAG |
| V3-341 F68  | CCATCTCATCCCTGCGTGTCTCCGACTCAG | ACGAGTGCTATC  | GT | CCTACGGGAGGCAGCAG |
| V3-341 F69  | CCATCTCATCCCTGCGTGTCTCCGACTCAG | ACTGATCTAGT   | GT | CCTACGGGAGGCAGCAG |
| V3-341 F70  | CCATCTCATCCCTGCGTGTCTCCGACTCAG | AGAGTCCTGAGC  | GT | CCTACGGGAGGCAGCAG |
| V3-341 F71  | CCATCTCATCCCTGCGTGTCTCCGACTCAG | AGCGAGCTATCT  | GT | CCTACGGGAGGCAGCAG |
| V3-341 F72  | CCATCTCATCCCTGCGTGTCTCCGACTCAG | AGTACTGCAGGC  | GT | CCTACGGGAGGCAGCAG |
| V3-341 F73  | CCATCTCATCCCTGCGTGTCTCCGACTCAG | ACACACTATGGC  | GT | CCTACGGGAGGCAGCAG |
| V3-341 F74  | CCATCTCATCCCTGCGTGTCTCCGACTCAG | ACGATGCGACCA  | GT | CCTACGGGAGGCAGCAG |
| V3-341 F75  | CCATCTCATCCCTGCGTGTCTCCGACTCAG | ACGTTAGCACAC  | GT | CCTACGGGAGGCAGCAG |
| V3-341 F76  | CCATCTCATCCCTGCGTGTCTCCGACTCAG | ACTGTACGCGTA  | GT | CCTACGGGAGGCAGCAG |
| V3-341 F77  | CCATCTCATCCCTGCGTGTCTCCGACTCAG | AGATACACGCGC  | GT | CCTACGGGAGGCAGCAG |
| V3-341 F78  | CCATCTCATCCCTGCGTGTCTCCGACTCAG | AGCGCTGATGTG  | GT | CCTACGGGAGGCAGCAG |
| V3-341 F79  | CCATCTCATCCCTGCGTGTCTCCGACTCAG | ACACATGTCTAC  | GT | CCTACGGGAGGCAGCAG |
| V3-341 F80  | CCATCTCATCCCTGCGTGTCTCCGACTCAG | ACATGATCGTTC  | GT | CCTACGGGAGGCAGCAG |
| V3-341 F81  | CCATCTCATCCCTGCGTGTCTCCGACTCAG | ACGCAACTGCTA  | GT | CCTACGGGAGGCAGCAG |
| V3-341 F82  | CCATCTCATCCCTGCGTGTCTCCGACTCAG | ACTGTGCAAGCT  | GT | CCTACGGGAGGCAGCAG |
| V3-341 F83  | CCATCTCATCCCTGCGTGTCTCCGACTCAG | AGCGTAGGTCGT  | GT | CCTACGGGAGGCAGCAG |
| V3-341 F84  | CCATCTCATCCCTGCGTGTCTCCGACTCAG | ACACGAGCCACA  | GT | CCTACGGGAGGCAGCAG |
| V3-341 F85  | CCATCTCATCCCTGCGTGTCTCCGACTCAG | ACATGTACAGTG  | GT | CCTACGGGAGGCAGCAG |
| V3-341 F86  | CCATCTCATCCCTGCGTGTCTCCGACTCAG | ACCGGATACTGG  | GT | CCTACGGGAGGCAGCAG |
| V3-341 F87  | CCATCTCATCCCTGCGTGTCTCCGACTCAG | ACTACGTGTGGT  | GT | CCTACGGGAGGCAGCAG |
| V3-341 F88  | CCATCTCATCCCTGCGTGTCTCCGACTCAG | ACTGTGACTTCA  | GT | CCTACGGGAGGCAGCAG |
| V3-341 F89  | CCATCTCATCCCTGCGTGTCTCCGACTCAG | AGATCTCTGCAT  | GT | CCTACGGGAGGCAGCAG |
| V3-341 F90  | CCATCTCATCCCTGCGTGTCTCCGACTCAG | AGCTATCCACGA  | GT | CCTACGGGAGGCAGCAG |
| V3-341 F91  | CCATCTCATCCCTGCGTGTCTCCGACTCAG | AGTCCATAGCTG  | GT | CCTACGGGAGGCAGCAG |
| V3-341 F92  | CCATCTCATCCCTGCGTGTCTCCGACTCAG | ACACGGTGTCTA  | GT | CCTACGGGAGGCAGCAG |
| V3-341 F93  | CCATCTCATCCCTGCGTGTCTCCGACTCAG | ACATTACAGCGA  | GT | CCTACGGGAGGCAGCAG |
| V3-341 F94  | CCATCTCATCCCTGCGTGTCTCCGACTCAG | ACTTGTAGCAGC  | GT | CCTACGGGAGGCAGCAG |
| V3-341 F95  | CCATCTCATCCCTGCGTGTCTCCGACTCAG | AGATGTCTGCT   | GT | CCTACGGGAGGCAGCAG |
| V3-341 F96  | CCATCTCATCCCTGCGTGTCTCCGACTCAG | AGCTCCATACAG  | GT | CCTACGGGAGGCAGCAG |
| V3-341 F97  | CCATCTCATCCCTGCGTGTCTCCGACTCAG | ACGCTATCTGGA  | GT | CCTACGGGAGGCAGCAG |
| V3-341 F98  | CCATCTCATCCCTGCGTGTCTCCGACTCAG | ACTATTGTACAG  | GT | CCTACGGGAGGCAGCAG |
| V3-341 F99  | CCATCTCATCCCTGCGTGTCTCCGACTCAG | AGAACACGTCTC  | GT | CCTACGGGAGGCAGCAG |
| V3-341 F100 | CCATCTCATCCCTGCGTGTCTCCGACTCAG | AGTGAGAGAAGC  | GT | CCTACGGGAGGCAGCAG |
| V3-518 R    | CCTCTCTATGGGCAGTCGGTGAT        | -----         | GT | ATTACCGCGGCTGCTGG |

V3-341F forward primer is complementary to positions 340-356, while V3-518R reverse primer is complementary to positions 517-533 of the *Escherichia coli* 16S rDNA molecule *rrnB* GenBank J01859.1. "-----" indicates no sequence.

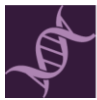

**Table S2.** Relative abundance at phylum level in MRS, HC, and NRS samples grouped according to SARS-CoV-2 rectal swab RT-ddPCR detection.

| Phylum           | MRS (% $\pm$ SD)  |                   | $p^*$ | HC (% $\pm$ SD)   |                   | $p^*$ | NRS (% $\pm$ SD)  |                   | $p^*$ |
|------------------|-------------------|-------------------|-------|-------------------|-------------------|-------|-------------------|-------------------|-------|
|                  | Negative          | Positive          |       | Negative          | Positive          |       | Negative          | Positive          |       |
| n                | 28                | 17                | --    | 28                | 21                | --    | 21                | 24                | --    |
| Actinobacteriota | 5.07 $\pm$ 5.35   | 7.41 $\pm$ 11.0   | 0.344 | 9.63 $\pm$ 6.83   | 13.48 $\pm$ 11.56 | 0.184 | 10.05 $\pm$ 11.19 | 13.67 $\pm$ 13.90 | 0.338 |
| Bacteroidota     | 34.02 $\pm$ 26.31 | 32.36 $\pm$ 23.03 | 0.831 | 3.52 $\pm$ 8.23   | 5.80 $\pm$ 13.78  | 0.504 | 3.23 $\pm$ 9.88   | 4.72 $\pm$ 10.27  | 0.624 |
| Firmicutes       | 39.91 $\pm$ 18.73 | 44.64 $\pm$ 19.02 | 0.420 | 64.41 $\pm$ 28.76 | 57.41 $\pm$ 27.61 | 0.392 | 44.26 $\pm$ 36.09 | 38.65 $\pm$ 30.27 | 0.578 |
| Proteobacteria   | 18.92 $\pm$ 23.47 | 13.44 $\pm$ 19.53 | 0.629 | 17.46 $\pm$ 18.56 | 20.70 $\pm$ 25.11 | 0.628 | 41.19 $\pm$ 34.76 | 41.53 $\pm$ 34.53 | 0.759 |
| Others           | 1.96 $\pm$ 3.50   | 1.52 $\pm$ 2.56   | 0.426 | 1.38 $\pm$ 1.85   | 1.72 $\pm$ 2.80   | 0.622 | 0.78 $\pm$ 1.33   | 0.91 $\pm$ 1.55   | 0.973 |

MRS, Mother Rectal Swab; HC, Human Colostrum; NRS, Neonate Rectal Swab; %, Relative abundance of each taxon; SD, Standard Deviation; \* $p$ -value was calculated according to T-test.

**Table S3.** Relative abundance at family level in MRS samples grouped according to SARS-CoV-2 rectal swab RT-ddPCR detection.

| Phylum           | Family                               | Negative          |      |          | Positive          |      |          | $p^{**}$ |
|------------------|--------------------------------------|-------------------|------|----------|-------------------|------|----------|----------|
|                  |                                      | % $\pm$ SD        | CV   | Range*   | % $\pm$ SD        | CV   | Range*   |          |
| Actinobacteriota | Bifidobacteriaceae                   | 0.8 $\pm$ 0.81    | 1.02 | 0.0-2.9  | 5.62 $\pm$ 10.89  | 2.07 | 0.0-45.6 | 0.040    |
|                  | Corynebacteriaceae                   | 0.07 $\pm$ 0.10   | 1.35 | 0.0-0.3  | 0.025 $\pm$ 0.11  | 4.57 | 0.0-0.6  | 0.128    |
|                  | Microbacteriaceae                    | 1.38 $\pm$ 2.12   | 1.54 | 0.0-7.0  | 0.25 $\pm$ 0.31   | 1.26 | 0.0-1.2  | 0.044    |
|                  | Propionibacteriaceae                 | 0.06 $\pm$ 0.11   | 1.72 | 0.0-0.3  | 0.08 $\pm$ 0.32   | 3.76 | 0.0-1.7  | 0.754    |
| Bacteroidota     | Bacteroidaceae                       | 6.26 $\pm$ 12.54  | 2.00 | 0.0-45.4 | 12.98 $\pm$ 9.84  | 1.22 | 0.0-49.2 | 0.123    |
|                  | Porphyromonadaceae                   | 3.28 $\pm$ 7.60   | 2.31 | 0.0-30.3 | 0.61 $\pm$ 9.84   | 4.82 | 0.0-15.7 | 0.182    |
|                  | Prevotellaceae                       | 20.88 $\pm$ 21.57 | 1.03 | 0.2-63.3 | 13.02 $\pm$ 19.82 | 1.52 | 0.0-81.2 | 0.230    |
|                  | Tannerellaceae                       | 1.04 $\pm$ 1.79   | 1.71 | 0.0-6.6  | 2.96 $\pm$ 7.05   | 2.37 | 0.0-37.8 | 0.180    |
| Firmicutes       | Clostridiaceae                       | 1.73 $\pm$ 2.98   | 1.71 | 0.0-9.0  | 0.51 $\pm$ 1.08   | 2.10 | 0.0-4.9  | 0.120    |
|                  | Enterococcaceae                      | 3.0 $\pm$ 9.73    | 3.24 | 0.0-40.1 | 1.05 $\pm$ 4.97   | 4.73 | 0.0-26.4 | 0.451    |
|                  | Erysipelotrichaceae                  | 2.6 $\pm$ 4.06    | 1.56 | 0.0-14.1 | 1.35 $\pm$ 1.88   | 1.39 | 0.0-6.2  | 0.247    |
|                  | Lachnospiraceae                      | 5.37 $\pm$ 4.61   | 0.85 | 0.0-16.1 | 8.30 $\pm$ 5.41   | 0.65 | 1.5-21.2 | 0.060    |
|                  | Lactobacillaceae                     | 0.41 $\pm$ 0.58   | 1.43 | 0.0-2.0  | 0.32 $\pm$ 0.62   | 1.95 | 0.0-2.2  | 0.630    |
|                  | Oscillospiraceae                     | 0.94 $\pm$ 1.11   | 1.18 | 0.0-4.1  | 3.05 $\pm$ 3.88   | 1.27 | 0.0-16.4 | 0.010    |
|                  | Peptostreptococcaceae-Tissierellales | 2.74 $\pm$ 5.58   | 2.03 | 0.0-18.2 | 0.50 $\pm$ 2.47   | 4.90 | 0.0-13.1 | 0.133    |
|                  | Ruminococcaceae                      | 7.78 $\pm$ 7.90   | 1.01 | 0.0-29.8 | 12.35 $\pm$ 12.39 | 1.00 | 0.9-49.6 | 0.138    |
|                  | Staphylococcaceae                    | 0.38 $\pm$ 1.24   | 3.25 | 0.0-5.1  | 0.06 $\pm$ 0.24   | 4.04 | 0.0-1.3  | 0.307    |
|                  | Streptococcaceae                     | 1.63 $\pm$ 1.96   | 1.20 | 0.0-6.1  | 0.78 $\pm$ 0.70   | 0.90 | 0.0-2.3  | 0.101    |
|                  | Veillonellaceae                      | 5.16 $\pm$ 8.99   | 1.74 | 0.0-31.2 | 9.27 $\pm$ 12.23  | 1.31 | 0.0-43.5 | 0.203    |
|                  | Others                               | 17.67 $\pm$ 9.84  | 0.56 | 1.4-35.9 | 15.03 $\pm$ 12.05 | 0.8  | 0.2-48.6 | 0.427    |
| Proteobacteria   | Comamonadaceae                       | 0.27 $\pm$ 0.58   | 2.16 | 0.0-2.2  | 0.12 $\pm$ 0.20   | 1.63 | 0.0-0.8  | 0.335    |
|                  | Enterobacteriaceae                   | 12.98 $\pm$ 24.74 | 1.90 | 0.0-88.8 | 11.31 $\pm$ 18.94 | 1.67 | 0.0-86.8 | 0.812    |
|                  | Moraxellaceae                        | 0.07 $\pm$ 0.14   | 2.11 | 0.0-0.5  | 0.06 $\pm$ 0.19   | 3.24 | 0.0-1.0  | 0.849    |
|                  | Pseudomonadaceae                     | 0.03 $\pm$ 0.08   | 2.44 | 0.0-0.3  | 0.08 $\pm$ 0.22   | 2.73 | 0.0-0.8  | 0.328    |
|                  | Sphingomonadaceae                    | 2.07 $\pm$ 3.88   | 1.87 | 0.0-13.0 | 0.27 $\pm$ 0.59   | 1.97 | 0.0-2.5  | 0.076    |
|                  | Xanthobacteraceae                    | 0.76 $\pm$ 1.27   | 1.66 | 0.0-4.0  | 0.14 $\pm$ 0.31   | 2.20 | 0.0-1.2  | 0.064    |

Positive (n=17); Negative (n=28); MRS, Mother Rectal Swab; %, Relative abundance of each taxon; SD, Standard Deviation; CV, Coefficient of Variation; \*Range, denotes the minimum and maximum values in the relative abundance for each taxon; \*\* $p$ -value was calculated according to T-test;  $p < 0.05$  are considered statistically significant differences.



**Table S4.** Relative abundance at family level in HC samples grouped according to SARS-CoV-2 rectal swab RT-ddPCR detection.

| Phylum           | Family                               | Negative    |      |          | Positive    |      |          | <i>p</i> ** |
|------------------|--------------------------------------|-------------|------|----------|-------------|------|----------|-------------|
|                  |                                      | % ± SD      | CV   | Range*   | % ± SD      | CV   | Range*   |             |
| Actinobacteriota | Bifidobacteriaceae                   | 0.34±0.53   | 1.59 | 0.0-2.2  | 0.35±0.62   | 1.78 | 0.0-2.8  | 0.944       |
|                  | Corynebacteriaceae                   | 1.85±1.92   | 1.04 | 0.0-6.5  | 3.26±4.90   | 1.5  | 0.0-21.5 | 0.224       |
|                  | Microbacteriaceae                    | 1.7±2.31    | 1.36 | 0.0-9.1  | 1.9±2.45    | 1.29 | 0.0-8.8  | 0.778       |
|                  | Propionibacteriaceae                 | 2.57±2.71   | 1.05 | 0.1-9.3  | 4.58±4.60   | 1.01 | 0.0-17.8 | 0.085       |
| Bacteroidota     | Bacteroidaceae                       | 0.07±0.22   | 3.23 | 0.0-1.1  | 0.06±0.16   | 2.53 | 0.0-0.6  | 0.912       |
|                  | Porphyromonadaceae                   | 0.05±0.21   | 3.98 | 0.0-1.1  | 1.2±5.16    | 4.3  | 0.0-23.7 | 0.320       |
|                  | Prevotellaceae                       | 2.73±8.04   | 2.95 | 0.0-41   | 3.80±13.07  | 3.44 | 0.0-60.4 | 0.741       |
|                  | Tannerellaceae                       | 0.00±0.00   | 0.0  | 0.0-0.0  | 0.01±0.04   | 4.58 | 0.0-0.2  | 0.329       |
| Firmicutes       | Clostridiaceae                       | 0.51±0.63   | 1.23 | 0.0-2.2  | 0.034±0.38  | 1.11 | 0.0-1.2  | 0.252       |
|                  | Enterococcaceae                      | 0.15±0.39   | 2.68 | 0.0-2.0  | 0.37±0.95   | 2.60 | 0.0-4.3  | 0.328       |
|                  | Erysipelotrichaceae                  | 0.13±0.34   | 1.3  | 0.0-1.3  | 0.13±0.28   | 2.16 | 0.0-1.1  | 1.000       |
|                  | Lachnospiraceae                      | 0.73±1.14   | 1.57 | 0.0-4.9  | 1.24±2.67   | 2.15 | 0.0-11.8 | 0.419       |
|                  | Lactobacillaceae                     | 2.4±3.24    | 1.35 | 0.0-12.8 | 6.44±18.11  | 2.81 | 0.0-78.5 | 0.323       |
|                  | Oscillospiraceae                     | 0.8±0.14    | 1.74 | 0.0-0.5  | 0.16±0.46   | 2.93 | 0.0-2.1  | 0.456       |
|                  | Peptostreptococcaceae-Tissierellales | 0.51±0.8    | 1.56 | 0.0-2.8  | 1.31±2.87   | 2.19 | 0.0-11.8 | 0.227       |
|                  | Ruminococcaceae                      | 0.4±0.52    | 1.31 | 0.0-1.7  | 0.64±1.16   | 1.82 | 0.0-4.5  | 0.382       |
|                  | Staphylococcaceae                    | 55.27±34.92 | 0.63 | 1.2-99.0 | 40.58±31.46 | 0.78 | 0.0-99.8 | 0.129       |
|                  | Streptococcaceae                     | 2.13±4.5    | 2.11 | 0.0-18.4 | 4.10±8.61   | 2.10 | 0.0-33.5 | 0.345       |
|                  | Veillonellaceae                      | 1.21±5.05   | 4.18 | 0.0-26.9 | 1.15±2.34   | 2.04 | 0.0-8.7  | 0.956       |
| Proteobacteria   | Comamonadaceae                       | 1.2±2.23    | 1.85 | 0.0-11.4 | 1.05±1.77   | 1.69 | 0.0-6.9  | 0.792       |
|                  | Enterobacteriaceae                   | 2.29±4.6    | 2.0  | 0.0-21.1 | 5.93±21.61  | 3.65 | 0.0-100  | 0.456       |
|                  | Moraxellaceae                        | 3.1±3.89    | 1.25 | 0.0-16.6 | 2.76±3.08   | 1.12 | 0.0-11.1 | 0.733       |
|                  | Pseudomonadaceae                     | 0.92±1.85   | 2.0  | 0.0-8.2  | 3.4±10.12   | 2.97 | 0.0-45.2 | 0.279       |
|                  | Sphingomonadaceae                    | 1.45±1.77   | 1.22 | 0.0-6.8  | 1.93±2.37   | 1.22 | 0.0-9.8  | 0.437       |
|                  | Xanthobacteraceae                    | 1.45±2.94   | 2.04 | 0.0-14.7 | 1.62±2.01   | 1.24 | 0.0-7.0  | 0.803       |
|                  | Others                               | 13.03±14.77 | 1.13 | 0.0-58.1 | 10.74±10.29 | 0.96 | 0.0-34.8 | 0.527       |

Positive (n=21), Negative (n=28), HC, Human Colostrum; %, Relative abundance of each taxon; SD, Standard Deviation; CV, Coefficient of Variation; \*Range, denotes the minimum and maximum values in the relative abundance for each taxon; \*\**p*-value was calculated according to T-test, *p* < 0.05 are considered statistically significant differences.

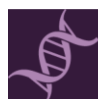

**Table S5.** Relative abundance at family level in NRS samples grouped according to SARS-CoV-2 rectal swab RT-ddPCR detection.

| Phylum           | Family                               | Negative    |      |          | Positive    |      |           | <i>p</i> ** |
|------------------|--------------------------------------|-------------|------|----------|-------------|------|-----------|-------------|
|                  |                                      | % ± SD      | CV   | Range*   | % ± SD      | CV   | Range*    |             |
| Actinobacteriota | Bifidobacteriaceae                   | 0.74±2.51   | 3.38 | 0.0-11.5 | 2.71±5.88   | 2.17 | 0.0-24.0  | 0.145       |
|                  | Corynebacteriaceae                   | 1.26±2.56   | 2.04 | 0.0-11.6 | 0.78±1.34   | 1.73 | 0.0-4.8   | 0.444       |
|                  | Microbacteriaceae                    | 3.24±4.09   | 1.26 | 0.0-10.8 | 2.94±5.05   | 1.72 | 0.0-16.5  | 0.826       |
|                  | Propionibacteriaceae                 | 2.61±4.13   | 1.58 | 0.0-14.7 | 3.23±7.26   | 2.25 | 0.0-33.8  | 0.721       |
| Bacteroidota     | Bacteroidaceae                       | 0.92±3.46   | 3.75 | 0.0-15.8 | 1.31±4.54   | 3.46 | 0.0-22.2  | 0.746       |
|                  | Porphyromonadaceae                   | 0.02±0.06   | 2.62 | 0.0-0.2  | 0.04±0.12   | 2.82 | 0.0-0.4   | 0.521       |
|                  | Prevotellaceae                       | 1.51±5.34   | 3.54 | 0.0-24.6 | 1.23±2.54   | 2.06 | 0.0-12.1  | 0.830       |
|                  | Tannerellaceae                       | 0.14±0.59   | 4.26 | 0.0-2.7  | 0.12±0.37   | 3.07 | 0.0-1.7   | 0.908       |
| Firmicutes       | Clostridiaceae                       | 4.28±8.51   | 1.99 | 0.0-29.5 | 5.41±10.85  | 2.00 | 0.0-35.7  | 0.696       |
|                  | Enterococcaceae                      | 0.75±1.4    | 1.87 | 0.0-5.4  | 2.7±6.41    | 2.38 | 0.0-23.8  | 0.159       |
|                  | Erysipelotrichaceae                  | 0.17±0.66   | 3.95 | 0.0-3.0  | 1.1±2.71    | 2.47 | 0.0-12.0  | 0.116       |
|                  | Lachnospiraceae                      | 1.19±2.91   | 2.45 | 0.0-12.9 | 5.85±11.72  | 2.00 | 0.0-48.1  | 0.070       |
|                  | Lactobacillaceae                     | 5.19±10.38  | 2.0  | 0.0-34.8 | 6.92±12.98  | 1.88 | 0.0-40.3  | 0.622       |
|                  | Oscillospiraceae                     | 0.03±0.06   | 1.96 | 0.0-0.2  | 0.44±1.02   | 2.29 | 0.0-4.4   | 0.057       |
|                  | Peptostreptococcaceae-Tissierellales | 0.0±0.09    | 2.27 | 0.0-0.3  | 0.05±0.09   | 2.03 | 0.0-0.3   | 0.774       |
|                  | Ruminococcaceae                      | 0.68±1.55   | 2.29 | 0.0-6.9  | 3.83±6.58   | 1.72 | 0.0-25.0  | 0.031       |
|                  | Staphylococcaceae                    | 0.5±0.66    | 1.32 | 0.0-2.3  | 1.67±3.94   | 2.37 | 0.0-15.1  | 0.166       |
|                  | Streptococcaceae                     | 28.28±39.17 | 1.39 | 0.0-97.6 | 5.03±10.57  | 2.10 | 0.0-49.4  | 0.014       |
|                  | Veillonellaceae                      | 2.41±6.67   | 2.76 | 0.0-28.4 | 3.49±9.71   | 2.78 | 0.0-46.0  | 0.664       |
|                  | Others                               | 8.55±8.32   | 0.97 | 0.0-23.7 | 13.9±16.08  | 1.16 | 0.0-57.7  | 0.162       |
| Proteobacteria   | Comamonadaceae                       | 3.59±5.68   | 1.58 | 0.0-22.3 | 2.48±5.51   | 2.23 | 0.0-26.6  | 0.510       |
|                  | Enterobacteriaceae                   | 20.37±34.19 | 1.68 | 0.0-99.9 | 25.27±36.21 | 1.43 | 0.0-100.0 | 0.643       |
|                  | Moraxellaceae                        | 1.24±2.01   | 1.62 | 0.0-8.6  | 1.96±2.57   | 1.31 | 0.0-7.9   | 0.301       |
|                  | Pseudomonadaceae                     | 4.20±18.72  | 4.45 | 0.0-85.9 | 0.3±0.48    | 1.59 | 0.0-1.7   | 0.351       |
|                  | Sphingomonadaceae                    | 2.72±3.35   | 1.23 | 0.0-9.0  | 4.07±6.58   | 1.62 | 0.0-19.0  | 0.384       |
|                  | Xanthobacteraceae                    | 4.87±9.55   | 1.96 | 0.0-28.3 | 2.61±4.94   | 1.89 | 0.0-20.2  | 0.337       |

Positive (n=24); Negative (n=21); NRS, Neonate Rectal Swab; %, Relative abundance of each taxon; SD, Standard Deviation; CV, Coefficient of Variation; \*Range, denotes the minimum and maximum values in the relative abundance for each taxon; \*\**p*-value was calculated according to T-test; *p* < 0.05 are considered statistically significant differences.

**Table S7.** Diversity index of bacterial grouped positive and negative by RT-ddPCR.

| Index    | HC (-)      | HC (+)      | <i>p</i> * | MRS (-)     | MRS (+)      | <i>p</i> * | NRS (-)     | NRS (+)     | <i>p</i> * |
|----------|-------------|-------------|------------|-------------|--------------|------------|-------------|-------------|------------|
| Observed | 64.32±34.62 | 69.10±36.01 | 0.643      | 93.65±22.10 | 99.86±27.19  | 0.408      | 56.67±38.01 | 58.92±37.78 | 0.843      |
| Chao 1   | 87.37±51.02 | 90.49±47.28 | 0.826      | 80.08±52.05 | 141.91±43.98 | 0.531      | 80.08±52.05 | 74.82±52.42 | 0.738      |
| Shannon  | 2.23±1.14   | 2.34±1.02   | 0.729      | 3.18±0.76   | 3.13±0.72    | 0.816      | 2.05±1.13   | 2.45±1.08   | 0.242      |
| Simpson  | 0.67±0.25   | 0.71±0.25   | 0.570      | 0.87±0.18   | 0.87±0.14    | 0.955      | 0.66±0.24   | 0.77±0.24   | 0.181      |

HC, Human Colostrum; MRS, Mother Rectal Swab; NRS, Neonatal Rectal Swab; Standard deviation is shown as ± values; \**p*-value was calculated according to the T-test; *p* < 0.05 are considered a statistically significant difference.



**Table S8.** Linear discriminant analysis (LDA) effect size (LEfSe) analysis, samples grouped according to SARS-CoV-2 rectal swab RT-ddPCR detection.

| Group | Phylum            | Taxa                                   | LDA   | p-value | q-value |
|-------|-------------------|----------------------------------------|-------|---------|---------|
| MRS - | Actinobacteria    | <i>g_Dietzia</i>                       | 2.140 | 0.033   | 0.041   |
|       | Actinobacteria    | <i>g_Microbacterium</i>                | 3.665 | 0.019   | 0.041   |
|       | Bacteroidetes     | <i>g_Alloprevotella</i>                | 3.259 | 0.020   | 0.041   |
|       | Firmicutes        | <i>g_Fenollaria</i>                    | 3.614 | 0.036   | 0.041   |
|       | Firmicutes        | <i>g_Granulicatella</i>                | 2.181 | 0.031   | 0.041   |
|       | Firmicutes        | <i>g_Mogibacterium</i>                 | 2.311 | 0.038   | 0.041   |
|       | Firmicutes        | <i>g_Parvimonas</i>                    | 2.207 | 0.038   | 0.041   |
|       | Firmicutes        | <i>g_Saccharofermentans</i>            | 2.309 | 0.016   | 0.041   |
|       | Proteobacteria    | <i>g_Bradyrhizobium</i>                | 3.385 | 0.027   | 0.041   |
|       | Proteobacteria    | <i>g_Lautropia</i>                     | 2.864 | 0.038   | 0.041   |
| MRS + | Actinobacteria    | <i>g_Coriobacteriaceae_UCG_3</i>       | 2.150 | 0.027   | 0.041   |
|       | Bacteroidetes     | <i>g_Butyricimonas</i>                 | 2.873 | 0.025   | 0.041   |
|       | Firmicutes        | <i>g_Anaerotruncus</i>                 | 2.245 | 0.021   | 0.041   |
|       | Firmicutes        | <i>g_Candidatus_Soleaferrea</i>        | 2.276 | 0.030   | 0.041   |
|       | Firmicutes        | <i>g_Clostridia_vadinBB6_group</i>     | 2.295 | 0.014   | 0.041   |
|       | Firmicutes        | <i>g_Colidextribacter</i>              | 2.335 | 0.005   | 0.041   |
|       | Firmicutes        | <i>g_Eubacterium_siraeum_group</i>     | 2.825 | 0.040   | 0.041   |
|       | Firmicutes        | <i>g_Lachnospiraceae_ND3007_group</i>  | 2.456 | 0.022   | 0.041   |
|       | Firmicutes        | <i>g_NK4A214_group</i>                 | 2.860 | 0.039   | 0.041   |
|       | Firmicutes        | <i>g_Oscillibacter</i>                 | 2.804 | 0.036   | 0.041   |
|       | Firmicutes        | <i>f_Ruminococcaceae</i>               | 2.172 | 0.027   | 0.041   |
|       | Firmicutes        | <i>f_Ruminococcaceae_g_uncultured</i>  | 3.014 | 0.006   | 0.041   |
|       | Firmicutes        | <i>g_UBA1819</i>                       | 2.578 | 0.019   | 0.041   |
|       | Firmicutes        | <i>g_UCG_10</i>                        | 2.658 | 0.033   | 0.041   |
|       | Firmicutes        | <i>g_Flavonifractor</i>                | 2.699 | 0.039   | 0.041   |
|       | Proteobacteria    | <i>g_Undibacterium</i>                 | 2.507 | 0.027   | 0.041   |
|       | Verrucomicrobiota | <i>g_Akkermansia</i>                   | 2.825 | 0.049   | 0.049   |
| NRS - | Actinobacteria    | <i>g_Brevibacterium</i>                | 2.601 | 0.002   | 0.046   |
|       | Actinobacteria    | <i>f_Cellulomonadaceae</i>             | 2.551 | 0.022   | 0.046   |
|       | Actinobacteria    | <i>g_Nocardioidea</i>                  | 2.771 | 0.014   | 0.046   |
|       | Actinobacteria    | <i>f_Propionibacteriaceae</i>          | 2.660 | 0.022   | 0.046   |
|       | Bacteroidetes     | <i>g_Empedobacter</i>                  | 2.693 | 0.022   | 0.046   |
|       | Firmicutes        | <i>g_Aerococcus</i>                    | 2.328 | 0.043   | 0.047   |
|       | Firmicutes        | <i>g_Salinicoccus</i>                  | 2.823 | 0.043   | 0.047   |
|       | Proteobacteria    | <i>g_Allorhizobium</i>                 | 2.771 | 0.043   | 0.047   |
|       | Proteobacteria    | <i>g_Methylobacterium</i>              | 3.250 | 0.024   | 0.046   |
|       | Proteobacteria    | <i>g_Pantoea</i>                       | 2.629 | 0.043   | 0.047   |
|       | Proteobacteria    | <i>g_Tepidimonas</i>                   | 2.794 | 0.022   | 0.046   |
| NRS + | Actinobacteria    | <i>g_Bifidobacterium</i>               | 4.100 | 0.041   | 0.047   |
|       | Actinobacteria    | <i>g_Libanicoccus</i>                  | 2.745 | 0.042   | 0.047   |
|       | Firmicutes        | <i>f_Christensenellaceae_R_7_group</i> | 3.393 | 0.023   | 0.046   |
|       | Firmicutes        | <i>g_Colidextribacter</i>              | 2.528 | 0.035   | 0.047   |
|       | Firmicutes        | <i>g_Coproccoccus</i>                  | 2.658 | 0.035   | 0.047   |
|       | Firmicutes        | <i>g_Granulicatella</i>                | 2.553 | 0.037   | 0.047   |
|       | Firmicutes        | <i>f_Lachnospiraceae</i>               | 4.212 | 0.022   | 0.046   |
|       | Firmicutes        | <i>g_Paraclostridium</i>               | 3.207 | 0.007   | 0.046   |
|       | Firmicutes        | <i>g_Phascolarctobacterium</i>         | 2.564 | 0.010   | 0.046   |
|       | Firmicutes        | <i>g_Subdoligranulum</i>               | 3.707 | 0.045   | 0.048   |
|       | Proteobacteria    | <i>g_Ralstonia</i>                     | 2.702 | 0.019   | 0.046   |
|       | Proteobacteria    | <i>g_Undibacterium</i>                 | 3.876 | 0.049   | 0.049   |
| HC -  | Actinobacteria    | <i>f_Intrasporangiaceae</i>            | 2.496 | 0.039   | 0.046   |



|      |                |                                            |       |       |       |
|------|----------------|--------------------------------------------|-------|-------|-------|
|      | Firmicutes     | <i>g_Chryseomicrobium</i>                  | 2.258 | 0.027 | 0.046 |
|      | Firmicutes     | <i>g_Gemella</i>                           | 2.803 | 0.038 | 0.046 |
|      | Firmicutes     | <i>g_Skermanella</i>                       | 2.839 | 0.022 | 0.046 |
| HC + | Actinobacteria | <i>g_Lawsonella</i>                        | 3.031 | 0.018 | 0.046 |
|      | Cyanobacteria  | <i>g_Sericytochromatia</i>                 | 2.429 | 0.046 | 0.046 |
|      | Firmicutes     | <i>f_Ruminococcaceae, g_Incertae_Sedis</i> | 2.257 | 0.046 | 0.046 |
|      | Firmicutes     | <i>g_Monoglobus</i>                        | 2.118 | 0.046 | 0.046 |
|      | Firmicutes     | <i>f_Oscillospiraceae</i>                  | 2.103 | 0.046 | 0.046 |
|      | Firmicutes     | <i>g_Peptoniphilus</i>                     | 2.933 | 0.028 | 0.046 |
|      | Proteobacteria | <i>g_Comamonas</i>                         | 2.299 | 0.007 | 0.046 |
|      | Proteobacteria | <i>g_Serratia</i>                          | 2.735 | 0.046 | 0.046 |

The threshold on the logarithmic LDA score was set to 2.0. *p* and *q* values < 0.05 were considered statistically significant. *p*-value was adjusted with the Benjamini-Hochberg method and generated FDR value (*q*-value). MRS (Mother Rectal Swab); NRS (Neonatal Rectal Swab); HC (Human Colostrum); f (family); g (genus); LDA (Linear Discriminant Analysis).

**Table S9.** Relative abundance at genera level of most common bacterial taxa found in MRS samples classified by qiime SourceTracker analysis.

| Genera (MRS)            | Abundance (% ± SD) | Genera (Unknow)        | Abundance (% ± SD) |
|-------------------------|--------------------|------------------------|--------------------|
| <i>Acinetobacter</i>    | 3.187±3.56         | <i>Acinetobacter</i>   | 2.515±2.97         |
| <i>Bifidobacterium</i>  | 0.594±1.50         | <i>Allorhizobium</i>   | 1.038±6.81         |
| <i>Blautia</i>          | 0.697±1.29         | <i>Anaerococcus</i>    | 0.522±1.26         |
| <i>Bradyrhizobium</i>   | 3.742±5.13         | <i>Bradyrhizobium</i>  | 1.054±2.79         |
| <i>Clostridium</i>      | 1.021±1.33         | <i>Corynebacterium</i> | 3.040±4.85         |
| <i>Collinsella</i>      | 0.618±1.25         | <i>Cutibacterium</i>   | 4.661±5.11         |
| <i>Dialister</i>        | 0.661±1.65         | <i>Dialister</i>       | 1.028±4.75         |
| <i>Enterobacter</i>     | 0.556±2.43         | <i>Escherichia</i>     | 2.017±14.14        |
| <i>Enterococcus</i>     | 1.206±2.99         | <i>Lactobacillus</i>   | 4.334±12.40        |
| <i>Escherichia</i>      | 11.332±19.39       | <i>Meiothermus</i>     | 0.950±1.24         |
| <i>Faecalibacterium</i> | 1.110±2.42         | <i>Mesorhizobium</i>   | 0.527±0.96         |
| <i>Lactobacillus</i>    | 1.969±2.91         | <i>Micrococcus</i>     | 0.746±1.71         |
| <i>Microbacterium</i>   | 7.286±8.11         | <i>Porphyromonas</i>   | 0.550±3.51         |
| <i>Prevotella</i>       | 5.331±14.99        | <i>Prevotella</i>      | 1.803±6.07         |
| <i>Sphingomonas</i>     | 3.634±3.88         | <i>Proteus</i>         | 1.462±8.53         |
| <i>Staphylococcus</i>   | 46.037±30.65       | <i>Pseudomonas</i>     | 2.358±6.88         |
| <i>Streptococcus</i>    | 6.308±12.13        | <i>Sphingomonas</i>    | 0.927±1.11         |
| <i>Subdoligranulum</i>  | 0.645±1.20         | <i>Staphylococcus</i>  | 47.205±34.70       |
| Other                   | 3.560±6.09         | <i>Streptococcus</i>   | 2.081±5.52         |
|                         |                    | <i>Variovorax</i>      | 1.253±3.45         |
|                         |                    | <i>Veillonella</i>     | 0.659±2.32         |
|                         |                    | Other                  | 14.896±13.24       |

%, Relative abundance of each taxon; SD, Standard Deviation



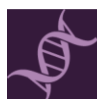

## Figures

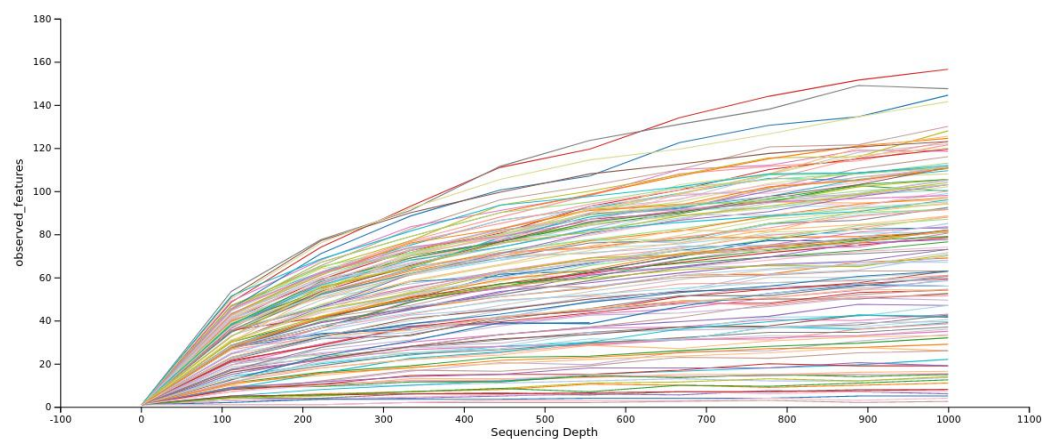

**Figure S1.** Rarefaction curves showing the bacterial richness based on observed features at 97% similarity using the Silva 138 database (Accessed in July 2022). Plots show total samples of MRS (Mother Rectal Swab), HC (Human Colostrum), and NRS (Neonate Rectal Swab) groups.



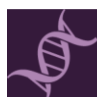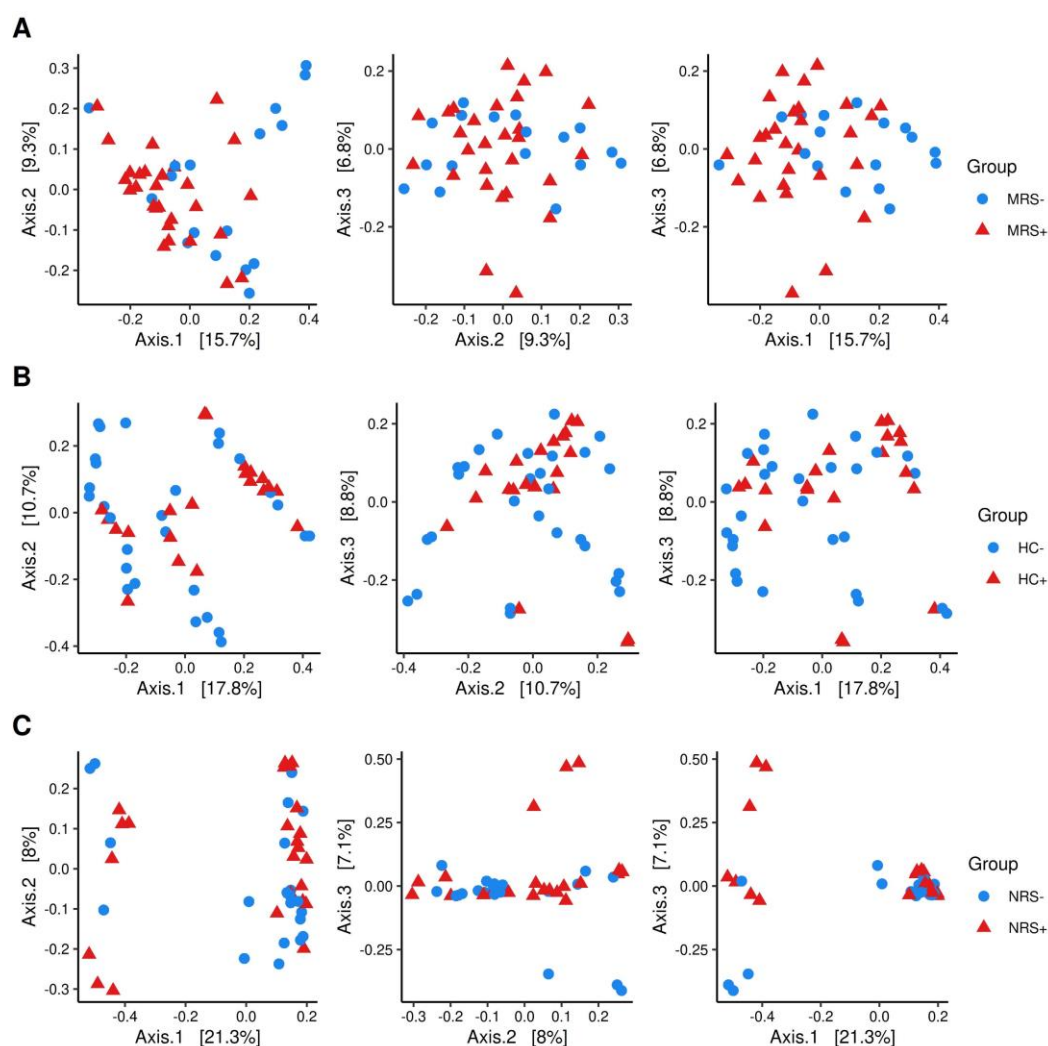

**Figure S2.** Beta diversity of bacteria in (A) MRS (Maternal Rectal Swab), (B) HC (Human Colostrum), and (C) NRS (Neonate Rectal Swab). The graphics show beta-diversity analyses calculated by dissimilarity metrics using the feature tables and Unweighted UniFrac analyses. The scatter plots were generated using principal coordinates analyses (PCoA) in three different axes showing the percentage of total differences. The positive (+) or negative (-) SARS-CoV-2 genome detection by ddPCR is shown beside the type of labels identified the samples at right side of the graphics. MRS group showed statistical differences according to ANOSIM ( $p$ -value = 0.004), HC and NRS got  $p$ -values of 0.105 and 0.175, respectively.

---end-of-document---
